# Variation in intraspecific demography drives localised concordance but species-wide discordance in responses to Plio-Pleistocene climatic change

Sean James Buckley<sup>1</sup>, Chris Brauer<sup>1</sup>, Peter J. Unmack<sup>2</sup>, Michael P. Hammer<sup>3</sup>,  
Luciano B. Beheregaray<sup>1\*</sup>

<sup>1</sup>Molecular Ecology Laboratory, College of Science and Engineering, Flinders University, Adelaide, SA 5001, Australia

<sup>2</sup>Centre for Applied Water Science, Institute for Applied Ecology, University of Canberra, ACT 2601, Australia

<sup>3</sup>Natural Sciences, Museum and Art Gallery of the Northern Territory, Darwin NT 0801, Australia

\* Correspondence: Luciano.Beheregaray@flinders.edu.au

Running head: Concordance vs discordance in climate change responses

Word count: 4835

**Keywords:** Coalescent analysis; biogeography; comparative phylogeography; temperate Australia; Percichthyidae

## Abstract

Understanding how species biology may facilitate resilience to climate change remains a critical factor in detecting and protecting species at risk of extinction. Many studies have focused on the role of particular ecological traits in driving species responses, but less so on demographic history and levels of standing genetic variation. We used environmental and genomic datasets to reconstruct the phylogeographic histories of two ecologically similar and largely co-distributed freshwater fishes to assess the degree of concordance in their responses to Plio-Pleistocene climatic changes. Although several co-occurring populations demonstrated concordant demographic histories, idiosyncratic population size changes were found at the range edges of the more spatially restricted species. Discordant responses between species were associated with low standing genetic variation in peripheral populations. This might have hindered adaptive potential, as documented in recent population declines and extinctions of the two species. Our results highlight both the role of spatial scale in the degree of concordance in species responses to climate change, and the importance of standing genetic variation in facilitating range shifts. Even when ecological traits are similar between species, long-term genetic diversity and historical population demography may lead to discordant responses to ongoing and future climate change.

## 1 **Introduction**

2 Understanding how or whether species may be able to adapt to current and future  
3 climatic changes is critical for conservation management of threatened taxa [1].  
4 However, predicting the susceptibility and extent of species loss due to climate  
5 change remains a challenge. To this end, many studies have instead sought to  
6 determine ecological traits that may confer resilience or susceptibility to climate  
7 change across various taxa [2]. Ecological and physiological traits such as thermal  
8 tolerance and dispersal capacity have been shown to be critical in driving adaptation  
9 to climatic changes [3, 4]. Demographic and genetic traits such as population size,  
10 stability and standing genetic variation (SGV) are however also important in  
11 facilitating adaptation to new environmental stressors [5], and likely play a major role  
12 in species responses to climate change [6-8].

13

14 From a genetic perspective, adaptation to novel climatic conditions more often relies  
15 upon SGV than *de novo* mutations [9-11]. The degree to which SGV is maintained  
16 within species or populations varies substantially across taxa and is influenced by a  
17 combination of demographic, ecological and environmental factors. For example,  
18 populations occurring at the edge of a species range often have lower connectivity  
19 and genetic diversity than their more central counterparts [12], including reduced  
20 diversity in climate-associated genes [13]. In marginal populations, persistence is  
21 driven by the balance of the steepness of the selective environment and the  
22 effectiveness of selection relative to genetic drift [14]. These components may  
23 contrast with the core of the distribution, where larger carrying capacities and SGV  
24 allow populations to persist closer to their selective optimum [15]. Thus, the  
25 interaction and spatial variability of neutral (demographic) and adaptive (ecological)

26 traits are critically important in understanding how species ranges may shift under  
27 climate change [16].

28

29 Understanding factors underlying species responses to historical climatic fluctuations  
30 provides an empirical framework for determining how species may respond to  
31 current and future environmental changes [17]. Extending phylogeographic analyses  
32 from taxon-specific studies to assessments of how species assemblages have  
33 responded to past climatic changes provides an approach to estimating the ubiquity  
34 of species responses [18]. Similar species responses (concordance) across  
35 disparate taxa often indicate that shared ecological traits underlie the response [19],  
36 or demonstrate the ubiquity in impact of the environmental change in question [20].  
37 Contrastingly, idiosyncratic responses (discordance) are often attributed to variation  
38 in species-specific ecological traits [21]. However, intraspecific variation in  
39 demography may lead to spatial variation in the degree of concordance, even across  
40 ecologically similar species. For example, the interactive role of demography and  
41 adaptive potential may lead to intraspecific variation at local scales, even if species-  
42 wide patterns are concordant across taxa or vice versa [22, 23]. These patterns may  
43 be reflected within species range shifts over time, where intraspecific variation in  
44 demographic or ecological traits at range margins may drive interspecific  
45 discordance in species responses to environmental change.

46

47 Biogeographic regions that experienced major environmental change in the past are  
48 particularly useful for studying species responses to climate change. In this regard,  
49 the southeast Australian temperate zone provides a model region to test how  
50 species have responded to major environmental changes such as aridification and

51 eustatic changes. Mainland Australia has experienced significant environmental  
52 changes since the late Miocene, which heralded the onset of major aridification [24].  
53 Other than a brief humid period during the Pliocene [25], this aridification intensified  
54 into the Pleistocene. While glacial periods in this region were not directly associated  
55 with the formation of glaciers, major changes in precipitation and temperature shifted  
56 ecosystems towards more arid conditions [26]. Concordantly, glacial maxima also  
57 drove eustatic changes, expanding much of the continental shelf as sea levels  
58 dropped [27]. The complex environmental history in southeast Australia, and its role  
59 on the evolution of temperate species, has been demonstrated by a number of  
60 phylogeographic studies (e.g. [28, 29]).

61

62 Freshwater-dependent species are important indicators of historical environmental  
63 changes given their reliance on suitable habitat and often limited capacity for  
64 dispersal [30]. Within temperate southeast Australia, the often co-distributed  
65 southern (*Nannoperca australis*) and Yarra (*N. obscura*) pygmy perch provide an  
66 ideal comparative study system. Both species possess highly similar morphology,  
67 reproductive biology, salinity tolerance and habitat preferences, and also display  
68 similar patterns of metapopulation structure [31-35]. Both species have low dispersal  
69 capacity with little to nil contemporary connectivity among catchments [33, 35]. Both  
70 species are relatively old (e.g. their lineages diverged around 13 million years ago  
71 [36]) and show strong population structure, with two evolutionarily significant units  
72 (ESUs) separating coastal and inland (Murray-Darling Basin) populations in *N.*  
73 *australis* [28], and two clades each containing two ESUs in *N. obscura* [37]. Given  
74 their isolated populations, it is expected that their long-term persistence along  
75 landscapes depends on spatial variation of locally adaptive traits. This hypothesis is

76 consistent with studies of *N. australis* that show that patterns of adaptation in traits  
77 related to reproductive fitness [38, 39], in levels of adaptive genetic diversity [34] and  
78 in variance of gene expression [40] are strongly associated with hydroclimatic  
79 gradients.

80

81 Despite their ecological similarities, the two species demonstrate marked differences  
82 in conservation status, genetic diversity and total distribution range. While both  
83 species are of conservation concern (*N. australis* as Near Threatened and *N.*  
84 *obscura* as Endangered) within the IUCN Red List [41] and in state conservation  
85 legislation, *N. obscura* is considered at higher risk due to their narrow range and  
86 extremely low genetic diversity [35, 42]. These factors are implicated in the local  
87 extirpation of *N. obscura* within the Murray-Darling Basin in the last five years,  
88 following failed reintroductions after a large-scale drought impacted the region [41].  
89 The relatively low genetic diversity of *N. obscura* is not thought to be the result of any  
90 particularly severe past bottleneck [42], complicating determining factors underlying  
91 this disparity. Additionally, it remains unclear whether the historical absence of *N.*  
92 *obscura* in some regions where *N. australis* is found is the result of historical local  
93 extinctions or a failure to initially colonise the habitat.

94

95 Here, we applied a comparative phylogeographic framework to explore the relative  
96 roles of ecological and demographic traits on evolutionary history. We used genomic  
97 datasets to estimate genetic diversity, phylogenetic relationships and demographic  
98 history of these two freshwater fishes, in conjunction with species distribution  
99 modelling. Then, we statistically evaluated regional concordance across co-occurring  
100 populations to assess whether the species shared demographic responses to

101 Pleistocene glacial cycles. We predicted that evolutionary patterns, demographic  
102 histories and distribution changes would be concordant across the two species if  
103 ecological factors played a relatively strong role in determining species responses to  
104 past climatic changes, with current differences owing to more recent factors.  
105 Contrastingly, discordant histories would indicate that genetic diversity and  
106 demography played a relatively larger role and underpinned their contemporary  
107 differences in conservation status. Our framework also includes differentiation of  
108 local-scale (population-level) and broad-scale (species-level) responses to assess  
109 the role of intraspecific patterns in driving lineage responses.

110

## 111 **Methods**

### 112 **Sample collection and genomic library preparation**

113 The distribution of both species spans the southwest Victoria biogeographic province  
114 and the lower reaches of the Murray-Darling Basin [31]. *Nannoperca australis* is  
115 more widely distributed and is also found across eastern Victorian drainages,  
116 northern Tasmania and the upper reaches of the southern Murray-Darling Basin [43].  
117 The final sample contains all known genetically distinct populations (including  
118 recently extirpated populations) across their full co-distributed range (electronic  
119 supplementary material, Table S1). This equals to seven populations of *N. obscura*  
120 and nine populations of *N. australis* occurring across all major drainages of the  
121 region (Figure 1). An additional 10 and 15 *N. obscura* and *N. australis* (respectively)  
122 from Lake Alexandrina within the lower Murray-Darling Basin were also included for  
123 more targeted demographic reconstruction of these populations. For phylogenetic  
124 analyses, five samples of a sister species (*Nannoperca vittata*) were included as  
125 outgroup [36]. Specimens were collected using electrofishing, dip-, fyke- or seine-

126 netting. Either the caudal fin or the entire specimen was stored at  $-80^{\circ}\text{C}$  at the South  
127 Australian Museum, or in 99% ethanol at Flinders University.

128

129 DNA was extracted from muscle tissue or fin clips using a modified salting-out  
130 method [44] or a Qiagen DNeasy kit (Qiagen Inc., Valencia, CA, USA). Genomic  
131 DNA was checked for quality using a spectrophotometer (NanoDrop, Thermo  
132 Scientific), integrity using 2% agarose gels, and quantity using a fluorometer (Qubit,  
133 Life Technologies). The ddRAD (double digest restriction-site associated DNA)  
134 genomic libraries were prepared in-house at the Molecular Ecology Lab of Flinders  
135 University following [34]. The majority of the samples (56/98) were paired-end  
136 sequenced on an Illumina HiSeq 2000 at Genome Quebec (Montreal, Canada). The  
137 remaining samples were single-end sequenced on an Illumina HiSeq 2500 at the  
138 South Australia Health and Medical Research Institute (SAHMRI).

139

#### 140 **Sequence filtering, alignment and SNP calling**

141 Sequences were demultiplexed using the 'process\_radtags' module of Stacks 1.29  
142 [45], allowing up to 2 mismatches in barcodes. Barcodes were removed and  
143 sequences trimmed to 80 bp to remove low-quality bases from the end of the reads.  
144 Trimmed reads were aligned using PyRAD 3.0.6 [46], and further cleaned by  
145 removing reads with >5 bp with a Phred score < 20. Loci were retained if they  
146 occurred in at least ~80% of samples (22 in *N. obscura*; 30 in *N. australis*) within the  
147 phylogenetic datasets.

148

149 For some population-specific analyses (e.g. some genetic diversity measures and  
150 coalescent-based demographic histories), we subsampled our ddRADseq data with



151 loci re-aligned and SNPs called separately for each population (excluding those with  
152  $n < 3$  due to low sample size) using PyRAD. This was done as most SNPs called at  
153 the species level were monomorphic within individual populations and would have  
154 significant effects on downstream analyses [47]. Only loci present in all individuals  
155 were kept to prevent missing data from biasing the site-frequency spectrum (SFS),  
156 used in all demographic analyses [48].

157

### 158 **Contemporary genetic diversity**

159 Summaries of population-level genetic diversity parameters (allelic richness and  
160 gene diversity) were compared across populations within species, and between  
161 species, using the R package *hierfstat* [49]. Given uneven sample sizes, rarefaction  
162 was used ( $n = 4$ ) to estimate mean values per locus per population. Due to the larger  
163 sample sizes available for Lake Alexandrina populations, genetic diversity  
164 parameters were also calculated using  $n = 15$  rarefaction and loci aligned separately  
165 within each Lake Alexandrina population. For these populations, we also calculated  
166 effective population size ( $N_e$ ) using NeEstimator [50] and a minor allele frequency  
167 threshold of 0.02. Additionally, nucleotide diversity ( $\pi$ ) within each population was  
168 estimated using dnaSP 6.1 [51]. Differences in population means of genetic diversity  
169 parameters between the two species were statistically evaluated using t-tests (two-  
170 tailed t-test or Wilcox test).

171

### 172 **Phylogenetic and historical migration analyses**

173 Maximum likelihood (ML) phylogenies of each species were estimated using RAxML  
174 8.2.11 [52] with the concatenated ddRAD alignments to estimate evolutionary  
175 relationships. Phylogenies were estimated under the GTR-GAMMA model of

176 evolution and 1,000 RELL bootstraps for each species. Additionally, we estimated  
177 gene trees for each RAD locus using IQ-TREE2 [53] to account for genome-wide  
178 heterogeneity and incomplete lineage sorting. Gene and site concordance factors  
179 [54] were estimated by comparing individual gene trees to the concatenated RAxML  
180 tree.

181

182 As historical migration may impact the topology of a phylogenetic tree, we also used  
183 TreeMix [55] to infer historical population connectivity. We iteratively increased the  
184 number of migrations from 0 –  $n$  for each species (nine in *N. australis*; seven in *N.*  
185 *obscura*) and evaluated the fit of each tree based on the standard error of the  
186 covariance matrix. We further assessed the fit of the trees by calculating the  
187 percentage of variance explained per model

188 ([https://github.com/wlz0726/Population\\_Genomics\\_Scripts/tree/master/03.treemix](https://github.com/wlz0726/Population_Genomics_Scripts/tree/master/03.treemix)).

189 The best supported number of migrations was determined by the asymptote of the  
190 likelihood, where additional migrations did not substantially increase model  
191 likelihood.

192

### 193 **Comparative demographic inference**

194 Long-term demographic histories for all populations were estimated using stairway  
195 plots and the SFS. One-dimensional SFS were calculated for each independent  
196 population alignment using an in-house script. Stairway plots were estimated  
197 assuming a mutation rate of  $10^{-8}$  mutations per site per generation, and a generation  
198 time of one year for both species [42, 56]. Although both species reproduce annually,  
199 most individuals do not live beyond one to two years in the wild [56]. We then  
200 analysed co-distributed populations of *N. australis* and *N. obscura* under two

201 coalescent frameworks to statistically evaluate the degree of concordant  
202 demographic history. The populations of Gnarkeet Creek (NauGCH and NobGCL),  
203 Merri River (NauMRG and NobMRG) and Lake Alexandrina (NauALE and NobCHI)  
204 were selected based on their contemporary co-occurrence and to represent the  
205 geographic range of the overlap in species distributions (Figure 1).

206

207 We first used FastSimCoal2 [57] to simulate model-based demographic histories  
208 over the last 30 Kyr. Simulations were conducted for each population under five  
209 different single population demographic scenarios (electronic supplementary  
210 material, Figure S1). Parameters were estimated using 40 optimisation cycles with  
211 500,000 simulations per scenario, with the fit of the models estimated using Akaike  
212 Information Criterion (AIC) and Akaike weights (electronic supplementary material,  
213 Methods and Table S2). Confidence intervals for the parameters specified in the best  
214 supported demographic model per population were estimated by simulating 100 SFS  
215 and re-simulating point estimates using 500,000 iterations per SFS.

216

217 Additionally, we ran co-demographic model-based simulations using the aggregate  
218 site frequency spectrum (aSFS) and hierarchical approximate Bayesian computation  
219 in Multi-DICE [58] to determine if demographic histories were congruent across co-  
220 distributed populations. A single model of exponential growth followed by exponential  
221 decline was applied to all populations using broad uniform priors (electronic  
222 supplementary material, Methods and Figure S2), based on results from  
223 FastSimCoal2 (see Results). We first tested the proportion of co-contracting taxa ( $\xi$ ),  
224 and then fixed this hyperparameter to better explore the remaining parameters. A  
225 “leave-one-out” approach using 50 pseudo-observed datasets was used to generate

226 a confusion matrix, with the most likely proportion of co-contracting taxa determined  
227 using the top 1,500 simulations and Bayes Factors. Parameters were estimated  
228 using 1.5 million coalescent simulations and posterior distributions estimated using  
229 the top 100 simulations and the *abc* R package [59]. We further tested whether  
230 demographic syndromes were broadly consistent across populations by comparing  
231 the posterior distributions for  $N_e$  and bottleneck strength ( $\epsilon$ ).

232

### 233 **Contemporary and paleoclimatic environmental modelling**

234 Species distribution models (SDMs) were estimated using an ensemble modelling  
235 approach within biomod2 [60]. We estimated SDMs for both species across eleven  
236 time slices ranging from contemporary conditions to the Pliocene using the  
237 PaleoClim database [61]. Occurrence records for both species were obtained from a  
238 combination of sampled sites within this and past studies [28, 35, 36], as well as  
239 from the Atlas of Living Australia (<http://www.ala.org.au/>). We filtered the occurrence  
240 data to reduce the impact of spatial autocorrelation, resulting in final datasets of  
241 1,021 and 163 observations for *N. australis* and *N. obscura*, respectively (electronic  
242 supplementary material, Methods).

243

244 We selected eight non-correlated environmental variables for estimating species  
245 distributions (electronic supplementary material, Table S3). These were annual  
246 mean temperature (Bio1), mean diurnal range (Bio2), isothermality (Bio3),  
247 temperature seasonality (Bio6), mean temperature of the wettest quarter (Bio8),  
248 mean temperature of the driest quarter (Bio9), annual precipitation (Bio12) and  
249 precipitation seasonality (Bio15). For the three oldest time periods, Bio2, Bio3 and  
250 Bio6 were unavailable and thus not included within the projections. SDMs were

251 estimated using MaxEnt, random forest and generalised linear models, and an  
252 ensemble model generated per time period using the weighted mean of all models.  
253 All models were evaluated using both the relative operating characteristic and the  
254 true skill statistic. We quantitatively assessed the relative stability of species  
255 distributions over time by estimating the mean and standard deviation of suitability  
256 over time for each species. Differences in distributional ranges between species  
257 across time were estimated by converting SDMs to binary presence-absence maps  
258 based on the minimum suitability of the top 90% of putative occurrences per model  
259 (electronic supplementary materials, Methods).

260

## 261 **Results**

### 262 **Bioinformatics**

263 We obtained 21,051 ddRAD loci containing 53,334 filtered SNPs for *N. obscura* and  
264 19,428 ddRAD loci containing 69,264 filtered SNPs for *N. australis*, with low missing  
265 data in both alignments (electronic supplementary material, Figure S1). Genetic  
266 diversity differed remarkably between the two species, with allelic richness, gene  
267 diversity, nucleotide diversity and number of SNPs per population alignment being  
268 significantly higher ( $p \leq 0.01$ ) in *N. australis* (electronic supplementary material,  
269 Table S1).

270

### 271 **Phylogenetic analysis**

272 Phylogenetic analysis of both datasets returned a highly supported phylogenetic tree  
273 for each species. Site concordance factors broadly supported these patterns,  
274 although gene concordance factors were low across both trees (electronic  
275 supplementary material, Figures S4–S6) – this is not unexpected when gene trees

276 are estimated from short and relatively uninformative individual loci [54]. For  
277 southern pygmy perch, the topology of this phylogenetic tree mirrored the  
278 geographic range of the samples, with a clear division between the Murray-Darling  
279 Basin ESU and the coastal ESU within the tree (Figure 2A). Within the coastal clade,  
280 populations diverged in a longitudinal manner, with eastern populations as the most  
281 recently diverged. In contrast, the phylogenetic tree for *N. obscura* did not  
282 demonstrate the same precise patterns, with populations not diverging in an exactly  
283 longitudinal manner. However, this was driven by a single outlier population  
284 (NobMEC).

285

286 TreeMix inferred a greater number of migration events within *N. australis* (four) than  
287 *N. obscura* (one event) (Figure 2B; electronic supplementary material, Figure S7).  
288 Within *N. australis*, migrations were inferred both across populations of the coastal  
289 lineage as well as into the Murray-Darling Basin. The strongest migrations were  
290 between eastern coastal populations, and from the ancestor of the westernmost  
291 coastal population into the ancestor of the Murray-Darling Basin lineages. For *N.*  
292 *obscura*, the single migration inferred suggested historical gene flow from the  
293 easternmost population to a more central population. Trees and migration edges for  
294 both species were well supported by covariance matrices, with low pairwise  
295 residuals (electronic supplementary material, Figure S8) and standard errors of < 1  
296 for any given population for both species (electronic supplementary material, Figure  
297 S9).

298

299

## 300 **Comparative demography**

301 Stairway plots demonstrated broadly similar demographic histories across the two  
302 species, with most populations relatively stable or declining slightly over the last 1  
303 Mya (Figure 3A). Populations within both species demonstrated variable  
304 demographic histories, although populations of *N. australis* appeared generally more  
305 stable over time. Both Lake Alexandrina populations (NobCHI and NauALE) showed  
306 significant historical increases in  $N_e$  >200 Kya, and long-term stable population sizes  
307 following this expansion.

308

309 Most populations chosen for comparative analysis demonstrated fluctuating  
310 demographic histories (Figure 3B), with a period of pre-LGM (Last Glacial Maximum)  
311 growth followed by a post-LGM decline (electronic supplementary material, Figure  
312 S10). Only the eastern *N. obscura* population (NobGCL) contrasted this pattern, with  
313 a model of low but constant population size more supported than other demographic  
314 histories (Model 3). Strong post-glacial declines were present in Lake Alexandrina  
315 populations of both species, with weaker declines in the more eastern population  
316 pairs.

317

318 A confusion matrix suggested that the co-demographic model was more likely to  
319 infer fully synchronous ( $\xi = 1$ ) or fully asynchronous ( $\xi = 0.167$ ) co-contractions over  
320 intermediate proportions of taxa (electronic supplementary material, Figure S11).  
321 Despite this, Bayes Factors supported a fully synchronous model over more  
322 asynchronous models, and so  $\xi$  was fixed to 1 to better explore other parameters  
323 (Figure 3C). Contemporary population sizes were inferred to be relatively small

324 across all populations with relatively weak post-glacial bottleneck strength (Figure  
325 3D; electronic supplementary material, Table S5). These bottlenecks were similar in  
326 magnitude across populations, as indicated by low values of the dispersion index  
327 (Figure 3E). However, Multi-DICE did not recover the same timing of the bottleneck,  
328 possibly due to relatively low resolution within the aSFS (Figure 3F). Overall, these  
329 results support a widespread and concordant bottleneck across the six co-distributed  
330 populations.

331

### 332 **Species distribution modelling**

333 Comparing the SDMs of the two species indicated much greater maximum  
334 distribution and variation in distributional range in *N. australis* than in *N. obscura*.  
335 *Nannoperca obscura* demonstrated long-term isolation to a relatively small region of  
336 southwest Victoria, whilst *N. australis* demonstrated a significant range expansion  
337 event throughout the early Pleistocene with a more recent contraction in the  
338 Holocene (electronic supplementary material, Figure S12). Despite these  
339 differences, both species maintained a shared climatic refugium in southwest  
340 Victoria, highlighted by a region of high mean suitability in both species (Figure 4B).

341

342 Comparisons across the different methods indicated that RandomForest was more  
343 conservative in estimating area (Figure 4A). While there was significant variation in  
344 estimated area across the different methods, ensemble models approximately  
345 captured the mean of all models. *Nannoperca australis* demonstrated significantly  
346 larger distributions throughout the Pleistocene compared to the relatively stable  
347 range of *N. obscura*, with the former spanning a range approximately twice as large  
348 as the latter during the mid-Pleistocene (Figure 4A). These patterns were similarly



349 reflected within the standard deviations across timeslices per species, with *N.*  
350 *australis* showing much higher variation over a larger area (Figure 4C).

351

## 352 **Discussion**

353 Our results demonstrate how spatial variation in demographic history may drive  
354 species-wide discordant responses to past climatic changes, even when local-scale  
355 impacts are concordant and species' ecological traits are similar. Specifically, we  
356 show that within a shared climatic refugium for two co-distributed and ecologically  
357 similar freshwater fishes, demographic histories were largely concordant. However,  
358 towards the edges of this refugium demographic histories decreased in  
359 concordance, suggesting that range edge populations of *N. obscura* were more  
360 limited than *N. australis* in their capacity for expansion during more favourable  
361 climatic conditions. Together, our findings determine the importance of intraspecific,  
362 population-level dynamics in driving species-wide adaptation and resilience to  
363 climate change.

364

365 The temperate zone of southeast Australia has undergone significant environmental  
366 change since the Pliocene, owing to a combination of continent-wide aridification  
367 [24], eustatic changes [28] and major hydrological rearrangements [62]. These  
368 various aspects likely had significant impacts on the persistence and connectivity of  
369 freshwater lineages across the region [43]. This was supported by the high level of  
370 phylogenetic structure within *N. australis*, and the inferred migration pathways that  
371 correspond well to those previously suggested through ancient hydrological conduits  
372 [62]. Although phylogenetic patterns in *N. obscura* did not directly match the  
373 longitudinal gradient of populations, earlier phylogenetic analyses using allozymes

374 and mitochondrial DNA showed a similar pattern [37]. This disjunction was attributed  
375 to potential historical connections from Mount Emu Creek into more western  
376 populations [35], although short branch lengths and low genetic diversity across the  
377 species may also indicate incomplete lineage sorting as a factor [63]. For both  
378 species, we denote two major clades: one of Murray-Darling Basin populations and  
379 another of coastal populations in *N. australis*, as suggested elsewhere [43], and two  
380 clades each containing two previously identified ESUs in *N. obscura* [37].

381

382 Within the species distribution models, a region of southwest Victoria was highlighted  
383 as a climatic refugium for both species throughout the Plio-Pleistocene. This region  
384 was consistently identified as suitable habitat for both species across all time slices.  
385 Although glacial maxima were associated with cold and arid conditions across  
386 Australia, coastal woodland habitats were likely buffered against intense aridification  
387 by oceanic circulation and relatively higher humidity and rainfall [64]. Other  
388 phylogeographical studies demonstrating limited impact of glacial maxima on  
389 connectivity supports the identity of this climatic refugium [27, 64]. Co-occurring  
390 populations within this shared refugium demonstrated highly congruent demographic  
391 histories at both more ancient (>1 Myr) and more recent (since the LGM) temporal  
392 scales. This concordance is expected when ecological traits, habitat preferences and  
393 environmental stability are shared across the species in question [21]. Although  
394 individual populations within each species demonstrated spatially variable  
395 demographic histories, comparisons across the two species showed similar patterns  
396 of  $N_e$  over time for most directly co-occurring populations.

397

398 Both pygmy perch species demonstrated temporally synchronous expansions during  
399 the LGM with post-glacial contractions across central populations. Despite intense  
400 inland aridification during glacial maxima, run-off in many southeast Australian rivers  
401 were likely much greater during the LGM [65]. These increased river flows have  
402 been attributed to seasonal snow melt of periglacial regions in the highlands and  
403 reduced vegetation cover, creating large rivers with enhanced run-off [65, 66]. Colder  
404 conditions and strong flows may have facilitated the observed concordant expansion  
405 in populations at this time, with the steep decline in flows during the early Holocene  
406 (14 – 7 Kya) potentially contributing to their more recent contraction [67]. However,  
407 concordance was reduced for pairwise populations that occurred closer to the edge  
408 of this shared refugium, suggesting the species had discordant responses at the  
409 fringe of the range. Similarly, phylogenetic patterns at the species-wide level varied  
410 between the two species, with clearer geographic sorting and historical migration  
411 across *N. australis* lineages compared to *N. obscura*.

412

413 Spatial variation in demographic history, and by extension concordance across taxa,  
414 may result from several different mechanisms [22, 68]. Particularly for narrowly  
415 distributed species, edge-of-range effects on populations close to the ecological  
416 tolerance threshold of the species may result in highly divergent patterns of  
417 demographic history and genetic diversity compared to more central populations [12,  
418 68]. By extension, the ecological range of species may be a strong factor driving  
419 discordance when particular locations are at the periphery of the distribution of one  
420 species, but not another. Given the broad similarity in ecological traits between the  
421 two species and their co-occurring nature [69], it is unlikely that this discordance in  
422 species-wide responses to past climatic changes is a result of different ecologies.

423 However, some variation in microhabitat preference seems to exist between species,  
424 with *N. obscura* limited to larger, lowland channels and floodplains whereas *N.*  
425 *australis* is also found in streams and dense swamps [69]. This suggests greater  
426 habitat specialisation in *N. obscura*, which might drive lower SGV (or result from it)  
427 and impede range expansions. Thus, we cannot completely rule out some role of  
428 ecology and its interactions with genetic diversity in driving discordant responses.  
429 The lower genetic diversity in *N. obscura* could not be directly attributed to notable  
430 and widespread genetic bottlenecks, suggesting instead that the species suffered  
431 from a consistent pattern of being genetically depauperate. Combined, these factors  
432 suggest that long-term SGV may be a key factor driving the temporally and spatially  
433 widespread discordance in response to Pleistocene climate changes.

434

435 Adaptive responses, particularly in scenarios of range expansion, are often driven by  
436 soft sweeps of SGV [8]. While many studies focus on rapid adaptation from SGV in  
437 terms of invasive species colonising new habitats [70], similar dynamics can be  
438 expected to play a role in range expansions of native taxa [71]. In regard to range  
439 shifts across the Pleistocene, higher SGV may have predisposed *N. australis* to  
440 capitalise on the colder temperatures and stronger rivers of glacial periods and  
441 subsequently expand. Similarly, historical connectivity across now-isolated river  
442 drainages [28] likely facilitated interpopulation gene flow, which may have further  
443 bolstered SGV and adaptive potential [68, 72]. This gene flow in *N. australis* may  
444 have also facilitated range expansion if locally adaptive alleles were transferred into  
445 edge populations [70]. Contrastingly, a lack of long-term SGV within *N. obscura* may  
446 have prevented them from expanding under these conditions, leading to the species-  
447 wide discordance. The spatial variation in the degree of concordance, with

448 discordance occurring at the edge of the *N. obscura* pre-glacial refugium, supports  
449 this conclusion.

450

451 Discordant species-wide responses to past climatic change may play an important  
452 role in contemporary genetic diversity and, by extension, current conservation  
453 efforts. For example, low genetic diversity resulting from historical bottlenecks can  
454 drive contemporary inbreeding depression [73]. Additionally, the parallels between  
455 historical range expansion scenarios and current reintroductions to conserve species  
456 demonstrates how historical processes may inform current practices [74]. For  
457 example, reduced adaptive capacity in *N. obscura* may have contributed to their  
458 local extirpation and to the failure of reintroductions of captive-born offspring at range  
459 margins, as documented for the lower Murray-Darling Basin [41]. This contrasts to  
460 the successful reintroduction of *N. australis* that simultaneously took place in that site  
461 using the same captive-breeding design [41, 42].

462

463 Understanding how, and which, species may be able to adapt under contemporary  
464 climate change remains a critical aspect of evolutionary biology [2]. Typically, this  
465 framework has focused on understanding how ecological traits may underpin  
466 individual species responses to climatic change [6]. However, demographic  
467 parameters are also critical components for species susceptibility to contemporary  
468 climate change [5]. Here, we demonstrate that intraspecific SGV may also be a  
469 critical component of species responses to climatic changes, particularly in range-  
470 edge populations. This corroborates studies indicating that adaptive potential is  
471 largely driven by SGV prior to the origination of major selective pressure [9] and  
472 suggests that considering broad ecology alone may not be enough to predict

473 species' ability to respond. Thus, understanding how the demographic history of  
474 individual populations may predispose, or hinder, species adaptive potential is an  
475 important component of conservation management of threatened species. For  
476 species with low SGV, proactive measures such as assisted gene flow and  
477 maintenance of effective population size may assist in their long-term conservation  
478 [75].

479

480 Long-term standing genetic variation drove discordance in the response of closely  
481 related and ecologically similar freshwater fishes to historical climate change, by  
482 facilitating range expansion of one species but not the other. However, in the centre  
483 of a shared habitat refugium, demographic histories were concordant, suggesting  
484 that spatial variation in the degree of concordance is linked to the interaction of  
485 standing genetic variation and distribution edge effects. Together, this demonstrates  
486 the importance of the maintenance of standing genetic variation for adaptive  
487 potential in response to climatic changes and the role of non-ecological traits in  
488 driving patterns of concordance or discordance.

489

## 490 **Acknowledgments**

491 We acknowledge researchers that provided samples or participated in field  
492 expeditions, especially Mark Adams. This work was supported by an Australian  
493 Research Council grant (FT130101068 to L.B.B.) and by an Australian Government  
494 Research Training Program Scholarship to S.J.B. This work received logistic support  
495 from Flinders University, University of Canberra and the South Australian Museum.

496

## 497 References

- 498 1. Waldvogel, A.M., Feldmeyer, B., Rolshausen, G., Exposito-Alonso, M., Rellstab,  
499 C., Kofler, R., Mock, T., Schmid, K., Schmitt, I., Bataillon, T., et al. 2020  
500 Evolutionary genomics can improve prediction of species' responses to  
501 climate change. *Evolution Letters* **4**, 4-18. (doi:10.1002/evl3.154).
- 502 2. Healy, T.M., Brennan, R.S., Whitehead, A. & Schulte, P.M. 2018 Tolerance traits  
503 related to climate change resilience are independent and polygenic. *Global*  
504 *Change Biology* **24**, 5348-5360. (doi:10.1111/gcb.14386).
- 505 3. Somero, G.N. 2010 The physiology of climate change: how potentials for  
506 acclimatization and genetic adaptation will determine 'winners' and 'losers'.  
507 *Journal of Experimental Biology* **213**, 912-920. (doi:10.1242/jeb.037473).
- 508 4. Travis, J.M.J., Delgado, M., Bocedi, G., Baguette, M., Bartoń, K., Bonte, D.,  
509 Boulangeat, I., Hodgson, J.A., Kubisch, A., Penteriani, V., et al. 2013  
510 Dispersal and species' responses to climate change. *Oikos* **122**, 1532-1540.  
511 (doi:10.1111/j.1600-0706.2013.00399.x).
- 512 5. Pearson, R.G., Stanton, J.C., Shoemaker, K.T., Aiello-Lammens, M.E., Ersts, P.J.,  
513 Horning, N., Fordham, D.A., Raxworthy, C.J., Ryu, H.Y., McNeese, J., et al.  
514 2014 Life history and spatial traits predict extinction risk due to climate  
515 change. *Nature Climate Change* **4**, 217-221. (doi:10.1038/nclimate2113).
- 516 6. Williams, S.E., Shoo, L.P., Isaac, J.L., Hoffmann, A.A. & Langham, G. 2008  
517 Towards an integrated framework for assessing the vulnerability of species to  
518 climate change. *PLoS Biology* **6**, 2621-2626.  
519 (doi:10.1371/journal.pbio.0060325).
- 520 7. Hoffmann, A.A. & Sgro, C.M. 2011 Climate change and evolutionary adaptation.  
521 *Nature* **470**, 479-485. (doi:10.1038/nature09670).
- 522 8. Stange, M., Barrett, R.D.H. & Hendry, A.P. 2021 The importance of genomic  
523 variation for biodiversity, ecosystems and people. *Nature Reviews Genetics*  
524 **22**, 89-105. (doi:10.1038/s41576-020-00288-7).
- 525 9. Lai, Y.-T., Yeung, C.K.L., Omland, K.E., Pang, E.-L., Hao, Y., Liao, B.-Y., Cao, H.-  
526 F., Zhang, B.-W., Yeh, C.-F., Hung, C.-M., et al. 2019 Standing genetic  
527 variation as the predominant source for adaptation of a songbird. *Proceedings*  
528 *of the National Academy of Sciences* **116**, 2152-2157.  
529 (doi:10.1073/pnas.1813597116).
- 530 10. Morris, M.R.J., Bowles, E., Allen, B.E., Jamniczky, H.A. & Rogers, S.M. 2018  
531 Contemporary ancestor? Adaptive divergence from standing genetic variation  
532 in Pacific marine threespine stickleback. *BMC Evolutionary Biology* **18**, 113.  
533 (doi:10.1186/s12862-018-1228-8).
- 534 11. DeWoody, J.A., Harder, A.M., Mathur, S. & Willoughby, J.R. 2021 The long-  
535 standing significance of genetic diversity in conservation. *Molecular Ecology*  
536 **30**, 4147-4154. (doi:https://doi.org/10.1111/mec.16051).
- 537 12. Eckert, C.G., Samis, K.E. & Loughheed, S.C. 2008 Genetic variation across  
538 species' geographical ranges: the central-marginal hypothesis and beyond.  
539 *Molecular Ecology* **17**, 1170-1188. (doi:10.1111/j.1365-294X.2007.03659.x).
- 540 13. Smith, S., Brauer, C.J., Sasaki, M., Unmack, P.J., Guillot, G., Laporte, M.,  
541 Bernatchez, L. & Beheregaray, L.B. 2020 Latitudinal variation in climate-  
542 associated genes imperils range edge populations. *Molecular Ecology* **29**,  
543 4337-4349. (doi:https://doi.org/10.1111/mec.15637).



- 544 14. Polechova, J. & Barton, N.H. 2015 Limits to adaptation along environmental  
545 gradients. *Proceedings of the National Academy of Sciences* **112**, 6401-6406.  
546 (doi:10.1073/pnas.1421515112).
- 547 15. Bridle, J.R., Polechova, J., Kawata, M. & Butlin, R.K. 2010 Why is adaptation  
548 prevented at ecological margins? New insights from individual-based  
549 simulations. *Ecology Letters* **13**, 485-494. (doi:10.1111/j.1461-  
550 0248.2010.01442.x).
- 551 16. Angert, A.L., Bradshaw, H.D., Jr. & Schemske, D.W. 2008 Using experimental  
552 evolution to investigate geographic range limits in monkeyflowers. *Evolution*  
553 **62**, 2660-2675. (doi:10.1111/j.1558-5646.2008.00471.x).
- 554 17. Fordham, D.A., Brook, B.W., Moritz, C. & Nogues-Bravo, D. 2014 Better  
555 forecasts of range dynamics using genetic data. *Trends in Ecology &*  
556 *Evolution* **29**, 436-443. (doi:10.1016/j.tree.2014.05.007).
- 557 18. Potter, S., Xue, A.T., Bragg, J.G., Rosauer, D.F., Roycroft, E.J. & Moritz, C. 2018  
558 Pleistocene climatic changes drive diversification across a tropical savanna.  
559 *Molecular Ecology* **27**, 520-532. (doi:10.1111/mec.14441).
- 560 19. Paz, A., Ibanez, R., Lips, K.R. & Crawford, A.J. 2015 Testing the role of ecology  
561 and life history in structuring genetic variation across a landscape: a trait-  
562 based phylogeographic approach. *Molecular Ecology* **24**, 3723-3737.  
563 (doi:10.1111/mec.13275).
- 564 20. Avise, J.C., Bowen, B.W. & Ayala, F.J. 2016 In the light of evolution X:  
565 Comparative phylogeography. *Proceedings of the National Academy of*  
566 *Sciences* **113**, 7957-7961. (doi:10.1073/pnas.1604338113).
- 567 21. Zamudio, K.R., Bell, R.C. & Mason, N.A. 2016 Phenotypes in phylogeography:  
568 Species' traits, environmental variation, and vertebrate diversification.  
569 *Proceedings of the National Academy of Sciences* **113**, 8041-8048.  
570 (doi:10.1073/pnas.1602237113).
- 571 22. Papadopoulou, A. & Knowles, L.L. 2016 Toward a paradigm shift in comparative  
572 phylogeography driven by trait-based hypotheses. *Proceedings of the*  
573 *National Academy of Sciences* **113**, 8018-8024.  
574 (doi:10.1073/pnas.1601069113).
- 575 23. DeChaine, E.G. & Martin, A.P. 2005 Historical biogeography of two alpine  
576 butterflies in the Rocky Mountains: broad-scale concordance and local-scale  
577 discordance. *Journal of Biogeography* **32**, 1943-1956. (doi:10.1111/j.1365-  
578 2699.2005.01356.x).
- 579 24. Byrne, M., Yeates, D.K., Joseph, L., Kearney, M., Bowler, J., Williams, M.A.,  
580 Cooper, S., Donnellan, S.C., Keogh, J.S., Leys, R., et al. 2008 Birth of a  
581 biome: insights into the assembly and maintenance of the Australian arid zone  
582 biota. *Molecular Ecology* **17**, 4398-4417. (doi:10.1111/j.1365-  
583 294X.2008.03899.x).
- 584 25. McLaren, S. & Wallace, M.W. 2010 Plio-Pleistocene climate change and the  
585 onset of aridity in southeastern Australia. *Global and Planetary Change* **71**,  
586 55-72. (doi:10.1016/j.gloplacha.2009.12.007).
- 587 26. Duckett, P.E., Stow, A.J. & Burrige, C. 2013 Higher genetic diversity is  
588 associated with stable water refugia for a gecko with a wide distribution in arid  
589 Australia. *Diversity and Distributions* **19**, 1072-1083. (doi:10.1111/ddi.12089).
- 590 27. Schultz, M.B., Ierodiaconou, D.A., Smith, S.A., Horwitz, P., Richardson, A.M.,  
591 Crandall, K.A. & Austin, C.M. 2008 Sea-level changes and palaeo-ranges:  
592 reconstruction of ancient shorelines and river drainages and the  
593 phylogeography of the Australian land crayfish *Engaeus sericatus* Clark



- 594 (Decapoda: Parastacidae). *Molecular Ecology* **17**, 5291-5314.  
595 (doi:10.1111/j.1365-294X.2008.03996.x).
- 596 28. Unmack, P.J., Hammer, M.P., Adams, M., Johnson, J.B. & Dowling, T.E. 2013  
597 The role of continental shelf width in determining freshwater phylogeographic  
598 patterns in south-eastern Australian pygmy perches (Teleostei:  
599 Percichthyidae). *Molecular Ecology* **22**, 1683-1699. (doi:10.1111/mec.12204).
- 600 29. Neal, W.C., James, E.A. & Bayly, M.J. 2019 Phylogeography, classification and  
601 conservation of pink zieria (*Zieria veronicea*; Rutaceae): influence of changes  
602 in climate, geology and sea level in south-eastern Australia. *Plant Systematics  
603 and Evolution*. (doi:10.1007/s00606-019-01589-z).
- 604 30. Davis, C.D., Epps, C.W., Flitcroft, R.L. & Banks, M.A. 2018 Refining and defining  
605 riverscape genetics: How rivers influence population genetic structure. *Wiley  
606 Interdisciplinary Reviews: Water* **5**, e1269. (doi:10.1002/wat2.1269).
- 607 31. Wedderburn, S.D., Hammer, M.P. & Bice, C.M. 2012 Shifts in small-bodied fish  
608 assemblages resulting from drought-induced water level recession in  
609 terminating lakes of the Murray-Darling Basin, Australia. *Hydrobiologia* **691**,  
610 35-46. (doi:10.1007/s10750-011-0993-9).
- 611 32. Hammer, M.P., Bice, C.M., Hall, A., Frears, A., Watt, A., Whiterod, N.S.,  
612 Beheregaray, L.B., Harris, J.O. & Zampatti, B.P. 2013 Freshwater fish  
613 conservation in the face of critical water shortages in the southern Murray-  
614 Darling Basin, Australia. *Marine and Freshwater Research* **64**, 807.  
615 (doi:10.1071/mf12258).
- 616 33. Cole, T.L., Hammer, M.P., Unmack, P.J., Teske, P.R., Brauer, C.J., Adams, M. &  
617 Beheregaray, L.B. 2016 Range-wide fragmentation in a threatened fish  
618 associated with post-European settlement modification in the Murray-Darling  
619 Basin, Australia. *Conservation Genetics* **17**, 1377-1391. (doi:10.1007/s10592-  
620 016-0868-8).
- 621 34. Brauer, C.J., Hammer, M.P. & Beheregaray, L.B. 2016 Riverscape genomics of a  
622 threatened fish across a hydroclimatically heterogeneous river basin.  
623 *Molecular Ecology* **25**, 5093-5113. (doi:10.1111/mec.13830).
- 624 35. Brauer, C.J., Unmack, P.J., Hammer, M.P., Adams, M. & Beheregaray, L.B.  
625 2013 Catchment-scale conservation units identified for the threatened Yarra  
626 pygmy perch (*Nannoperca obscura*) in highly modified river systems. *PLoS  
627 One* **8**, e82953. (doi:10.1371/journal.pone.0082953).
- 628 36. Buckley, S.J., Domingos, F.M.C.B., Attard, C., Brauer, C.J., Sandoval-Castillo,  
629 J., Lodge, R., Unmack, P. & Beheregaray, L.B. 2018 Phylogenomic history of  
630 enigmatic pygmy perches: implications for biogeography, taxonomy and  
631 conservation. *Royal Society Open Science* **5**.
- 632 37. Hammer, M.P., Unmack, P.J., Adams, M., Johnson, J.B. & Walker, K.F. 2010  
633 Phylogeographic structure in the threatened Yarra pygmy perch *Nannoperca  
634 obscura* (Teleostei: Percichthyidae) has major implications for declining  
635 populations. *Conservation Genetics* **11**, 213-223. (doi:10.1007/s10592-009-  
636 0024-9).
- 637 38. Morrongiello, J.R., Bond, N.R., Crook, D.A. & Wong, B.B. 2010 Nuptial coloration  
638 varies with ambient light environment in a freshwater fish. *Journal of  
639 Evolutionary Biology* **23**, 2718-2725. (doi:10.1111/j.1420-9101.2010.02149.x).
- 640 39. Morrongiello, J.R., Bond, N.R., Crook, D.A. & Wong, B.B.M. 2012 Spatial  
641 variation in egg size and egg number reflects trade-offs and bet-hedging in a  
642 freshwater fish. *Journal of Animal Ecology* **81**, 806-817. (doi:10.1111/j.1365-  
643 2656.2012.01961.x).

- 644 40. Brauer, C.J., Unmack, P.J. & Beheregaray, L.B. 2017 Comparative ecological  
645 transcriptomics and the contribution of gene expression to the evolutionary  
646 potential of a threatened fish. *Molecular Ecology* **26**, 6841-6856.  
647 (doi:10.1111/mec.14432).
- 648 41. Beheregaray, L.B., Attard, C.R., Brauer, C.J., Whiterod, N.S., Wedderburn, S.D.  
649 & Hammer, M.P. 2021 Conservation breeding and reintroduction of pygmy  
650 perches in the lower Murray-Darling Basin, Australia: two similar species, two  
651 contrasting outcomes. In *Global conservation translocation perspectives:  
652 2021. Case studies from around the globe* (ed. P.S. Soorae), pp. 26-31.  
653 Gland, Switzerland, IUCN SSC Conservation Translocation Specialist Group,  
654 Environment Agency - Abu Dhabi and Calgary Zoo, Canada.
- 655 42. Attard, C.R., Moller, L.M., Sasaki, M., Hammer, M.P., Bice, C.M., Brauer, C.J.,  
656 Carvalho, D.C., Harris, J.O. & Beheregaray, L.B. 2016 A novel holistic  
657 framework for genetic-based captive-breeding and reintroduction programs.  
658 *Conservation Biology* **30**, 1060-1069. (doi:10.1111/cobi.12699).
- 659 43. Buckley, S.J., Brauer, C., Unmack, P., Hammer, M. & Beheregaray, L.B. 2020  
660 The roles of aridification and sea level changes in the diversification and  
661 persistence of freshwater fish lineages. *Molecular Ecology*. (doi:  
662 10.1111/mec.16082).
- 663 44. Sunnucks, P. & Hales, D.F. 1996 Numerous transposed sequences of  
664 mitochondrial cytochrome oxidase I-II in aphids of the genus *Sitobion*  
665 (Hemiptera: Aphididae). *Molecular Biology and Evolution* **13**, 510-524.  
666 (doi:10.1093/oxfordjournals.molbev.a025612).
- 667 45. Catchen, J., Hohenlohe, P.A., Bassham, S., Amores, A. & Cresko, W.A. 2013  
668 Stacks: an analysis tool set for population genomics. *Molecular Ecology* **22**,  
669 3124-3140. (doi:10.1111/mec.12354).
- 670 46. Eaton, D.A. 2014 PyRAD: assembly of de novo RADseq loci for phylogenetic  
671 analyses. *Bioinformatics* **30**, 1844-1849. (doi:10.1093/bioinformatics/btu121).
- 672 47. Stadler, T., Haubold, B., Merino, C., Stephan, W. & Pfaffelhuber, P. 2009 The  
673 impact of sampling schemes on the site frequency spectrum in nonequilibrium  
674 subdivided populations. *Genetics* **182**, 205-216.  
675 (doi:10.1534/genetics.108.094904).
- 676 48. Shafer, A.B.A., Peart, C.R., Tusso, S., Maayan, I., Brelsford, A., Wheat, C.W.,  
677 Wolf, J.B.W. & Gilbert, M. 2017 Bioinformatic processing of RAD-seq data  
678 dramatically impacts downstream population genetic inference. *Methods in  
679 Ecology and Evolution* **8**, 907-917. (doi:10.1111/2041-210x.12700).
- 680 49. Goudet, J. 2005 hierfstat, a package for r to compute and test hierarchical F-  
681 statistics. *Molecular Ecology Notes* **5**, 184-186. (doi:10.1111/j.1471-  
682 8286.2004.00828.x).
- 683 50. Do, C., Waples, R.S., Peel, D., Macbeth, G.M., Tillett, B.J. & Ovenden, J.R. 2014  
684 NeEstimator v2: re-implementation of software for the estimation of  
685 contemporary effective population size ( $N_e$ ) from genetic data. *Molecular  
686 Ecology Resources* **14**, 209-214. (doi:10.1111/1755-0998.12157).
- 687 51. Rozas, J., Ferrer-Mata, A., Sanchez-DelBarrio, J.C., Guirao-Rico, S., Librado, P.,  
688 Ramos-Onsins, S.E. & Sanchez-Gracia, A. 2017 DnaSP 6: DNA sequence  
689 polymorphism analysis of large data sets. *Molecular Biology and Evolution* **34**,  
690 3299-3302. (doi:10.1093/molbev/msx248).
- 691 52. Stamatakis, A. 2014 RAXML version 8: a tool for phylogenetic analysis and post-  
692 analysis of large phylogenies. *Bioinformatics* **30**, 1312-1313.  
693 (doi:10.1093/bioinformatics/btu033).

- 694 53. Minh, B.Q., Schmidt, H.A., Chernomor, O., Schrempf, D., Woodhams, M.D., von  
695 Haeseler, A. & Lanfear, R. 2020 IQ-TREE 2: New Models and Efficient  
696 Methods for Phylogenetic Inference in the Genomic Era. *Molecular Biology  
697 and Evolution* **37**, 1530-1534. (doi:10.1093/molbev/msaa015).
- 698 54. Minh, B.Q., Hahn, M.W. & Lanfear, R. 2020 New methods to calculate  
699 concordance factors for phylogenomic datasets. *Molecular Biology and  
700 Evolution*. (doi:10.1093/molbev/msaa106).
- 701 55. Pickrell, J.K. & Pritchard, J.K. 2012 Inference of population splits and mixtures  
702 from genome-wide allele frequency data. *PLOS Genetics* **8**, e1002967.  
703 (doi:10.1371/journal.pgen.1002967).
- 704 56. Humphries, P. 1995 Life history, food and habitat of southern pygmy perch,  
705 *Nannoperca australis*, in the Macquarie River, Tasmania. *Marine and  
706 Freshwater Research* **46**, 1159-1169. (doi:10.1071/MF9951159).
- 707 57. Excoffier, L., Dupanloup, I., Huerta-Sanchez, E., Sousa, V.C. & Foll, M. 2013  
708 Robust demographic inference from genomic and SNP data. *PLoS Genetics*  
709 **9**, e1003905. (doi:10.1371/journal.pgen.1003905).
- 710 58. Xue, A.T. & Hickerson, M.J. 2017 multi-dice: r package for comparative  
711 population genomic inference under hierarchical co-demographic models of  
712 independent single-population size changes. *Molecular Ecology Resources*  
713 **17**, e212-e224. (doi:10.1111/1755-0998.12686).
- 714 59. Csilléry, K., François, O. & Blum, M.G.B. 2012 abc: an R package for  
715 approximate Bayesian computation (ABC). *Methods in Ecology and Evolution*  
716 **3**, 475-479. (doi:10.1111/j.2041-210X.2011.00179.x).
- 717 60. Thuiller, W., Lafourcade, B., Engler, R. & Araújo, M.B. 2009 BIOMOD – a  
718 platform for ensemble forecasting of species distributions. *Ecography* **32**, 369-  
719 373. (doi:10.1111/j.1600-0587.2008.05742.x).
- 720 61. Brown, J.L., Hill, D.J., Dolan, A.M., Carnaval, A.C. & Haywood, A.M. 2018  
721 PaleoClim, high spatial resolution paleoclimate surfaces for global land areas.  
722 *Scientific Data* **5**, 180254. (doi:10.1038/sdata.2018.254).
- 723 62. Waters, J.M., Burridge, C.P. & Craw, D. 2019 The lasting biological signature of  
724 Pliocene tectonics: Reviewing the re-routing of Australia's largest river  
725 drainage system. *Journal of Biogeography*. (doi:10.1111/jbi.13612).
- 726 63. Liu, L., Xi, Z. & Davis, C.C. 2015 Coalescent methods are robust to the  
727 simultaneous effects of long branches and incomplete lineage sorting.  
728 *Molecular Biology and Evolution* **32**, 791-805. (doi:10.1093/molbev/msu331).
- 729 64. Byrne, M. 2008 Evidence for multiple refugia at different time scales during  
730 Pleistocene climatic oscillations in southern Australia inferred from  
731 phylogeography. *Quaternary Science Reviews* **27**, 2576-2585.  
732 (doi:10.1016/j.quascirev.2008.08.032).
- 733 65. Hesse, P.P., Magee, J.W. & van der Kaars, S. 2004 Late Quaternary climates of  
734 the Australian arid zone: a review. *Quaternary International* **118-119**, 87-102.  
735 (doi:10.1016/S1040-6182(03)00132-0).
- 736 66. Pepper, M. & Keogh, J.S. 2021 Life in the “dead heart” of Australia: The  
737 geohistory of the Australian deserts and its impact on genetic diversity of arid  
738 zone lizards. *Journal of Biogeography* **48**, 716-746. (doi:10.1111/jbi.14063).
- 739 67. Fitzsimmons, K.E., Cohen, T.J., Hesse, P.P., Jansen, J., Nanson, G.C., May, J.-  
740 H., Barrows, T.T., Haberlah, D., Hilgers, A., Kelly, T., et al. 2013 Late  
741 Quaternary palaeoenvironmental change in the Australian drylands.  
742 *Quaternary Science Reviews* **74**, 78-96.  
743 (doi:10.1016/j.quascirev.2012.09.007).

- 744 68. Aitken, S.N., Yeaman, S., Holliday, J.A., Wang, T. & Curtis-McLane, S. 2008  
745 Adaptation, migration or extirpation: climate change outcomes for tree  
746 populations. *Evolutionary Applications* **1**, 95-111. (doi:10.1111/j.1752-  
747 4571.2007.00013.x).
- 748 69. Woodward, G.M.A. & Malone, B. 2002 Patterns of abundance and habitat use by  
749 *Nannoperca obscura* (Yarra pygmy perch) and *Nannoperca australis*  
750 (southern pygmy perch). *Proceedings of the Royal Society of Victoria* **114**, 61-  
751 72.
- 752 70. Prentis, P.J., Wilson, J.R., Dormontt, E.E., Richardson, D.M. & Lowe, A.J. 2008  
753 Adaptive evolution in invasive species. *Trends in Plant Science* **13**, 288-294.  
754 (doi:10.1016/j.tplants.2008.03.004).
- 755 71. Williams, J.L., Hufbauer, R.A. & Miller, T.E.X. 2019 How evolution modifies the  
756 variability of range expansion. *Trends in Ecology & Evolution* **34**, 903-913.  
757 (doi:10.1016/j.tree.2019.05.012).
- 758 72. Bridle, J.R. & Vines, T.H. 2007 Limits to evolution at range margins: when and  
759 why does adaptation fail? *Trends in Ecology & Evolution* **22**, 140-147.  
760 (doi:10.1016/j.tree.2006.11.002).
- 761 73. Bouzat, J.L. 2010 Conservation genetics of population bottlenecks: the role of  
762 chance, selection, and history. *Conservation Genetics* **11**, 463-478.  
763 (doi:10.1007/s10592-010-0049-0).
- 764 74. Szűcs, M., Vahsen, M.L., Melbourne, B.A., Hoover, C., Weiss-Lehman, C. &  
765 Hufbauer, R.A. 2017 Rapid adaptive evolution in novel environments acts as  
766 an architect of population range expansion. *Proceedings of the National*  
767 *Academy of Sciences* **114**, 13501-13506. (doi:10.1073/pnas.1712934114).
- 768 75. Pavlova, A., Beheregaray, L.B., Coleman, R., Gilligan, D., Harrisson, K.A.,  
769 Ingram, B.A., Kearns, J., Lamb, A.M., Lintermans, M., Lyon, J., et al. 2017  
770 Severe consequences of habitat fragmentation on genetic diversity of an  
771 endangered Australian freshwater fish: A call for assisted gene flow.  
772 *Evolutionary Applications* **10**, 531-550. (doi:10.1111/eva.12484).

773

774 **Figure captions**

775 **Figure 1:** Contemporary distribution and sampling map for *N. australis* and *N.*  
776 *obscura*. *Nannoperca australis* sampling sites are indicated in red, and *N. obscura*  
777 sites in blue. The distribution of *N. australis* is indicated with light green shading and  
778 dashed borders, with the distribution of *N. obscura* (also the region of co-occurrence)  
779 in darker green. The solid black line indicates the boundary of major drainage  
780 basins, and the dark blue line demonstrates the approximate shoreline during glacial  
781 maxima. Bottom left inset depicts study region and major drainage basins in  
782 Australia. Top right inset depicts the full extent of species distributions.

783

784 **Figure 2:** Phylogenetic histories and migration patterns in *N. australis* and *N.*  
785 *obscura*. **A:** Maximum likelihood phylogenetic trees based on ddRAD loci.  
786 Populations were reciprocally monophyletic and so were collapsed to the population  
787 level for simplicity. Both trees were rooted using *N. vittata* as the outgroup, which  
788 was dropped for visualisation. Node values show bootstrap support. Branch colours  
789 indicate the drainage basin of origin for each population or clade. **B:** Best supported  
790 ancestral migration patterns inferred using TreeMix based on SNP datasets. All  
791 displayed migrations were statistically significant ( $p < 0.05$ ). Arrows denote the  
792 direction of inferred migrations, with the colour indicating their relative weights.

793

794 **Figure 3:** Demographic histories of *N. australis* and *N. obscura* populations. **A:**  
795 Stairway plot reconstructions of demographic history. Inset stars indicate co-  
796 occurring populations which were further explored within a codemographic  
797 framework. Populations are arranged from westernmost to easternmost within each  
798 species. **B:** Most likely individual demographic histories for co-occurring *N. australis*



799 and *N. obscura* populations over the Pleistocene, simulated using FastSimCoal2.  
800 Thick dark lines indicate mean  $N_e$  over time, calculated based on the means of  
801 current  $N_e$ , rates of change and timing of switching rates (see Supplementary  
802 Material). Shaded areas indicate 95% confidence intervals based on the 97.5% and  
803 2.5% probability estimates for the same parameters. **C**: Bayes Factor matrix of the  
804 proportion of populations showing synchronised bottlenecks ( $\xi$ ) within a co-  
805 demographic model using Multi-DICE. Each cell compares the model in the column  
806 with the model in the row, with brighter colours indicating greater support for the  
807 column. **D**: Posterior distribution of mean bottleneck strength ( $\epsilon$ ) across all six  
808 populations. **E**: Posterior distribution of dispersion index of bottleneck strength  
809 ( $\text{Var}(\epsilon)/\text{Mean}(\epsilon)$ ) across all six populations. **F**: Posterior distribution of the timing of  
810 the bottleneck event, in generations/years.

811

812 **Figure 4:** Comparisons of summaries of distributional changes over eleven time  
813 periods spanning the Plio-Pleistocene. **A**: Distribution extent per species. Individual  
814 models are indicated by points, with SDM method indicated by colour. The 95%  
815 confidence interval across all individual models is shown by the pale blue ribbon.  
816 The ensemble model is represented by a solid black line. **B**: Mean cell suitability  
817 across all time periods. **C**: Variation (standard deviation) in cell suitability across all  
818 time periods.

819 Figures

820 **Figure 1**

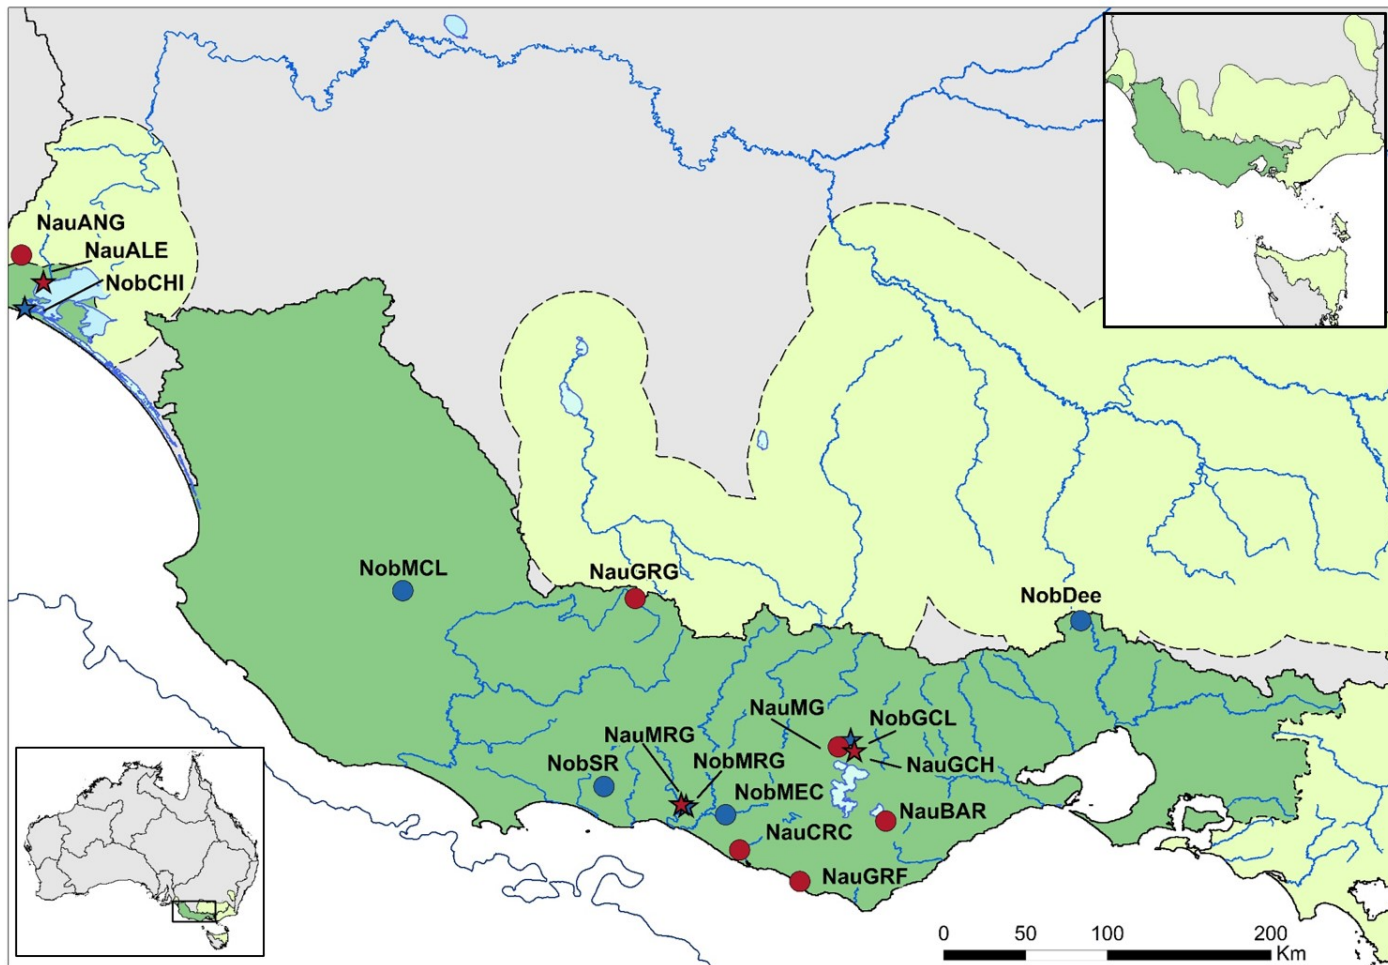

824 **Figure 2**

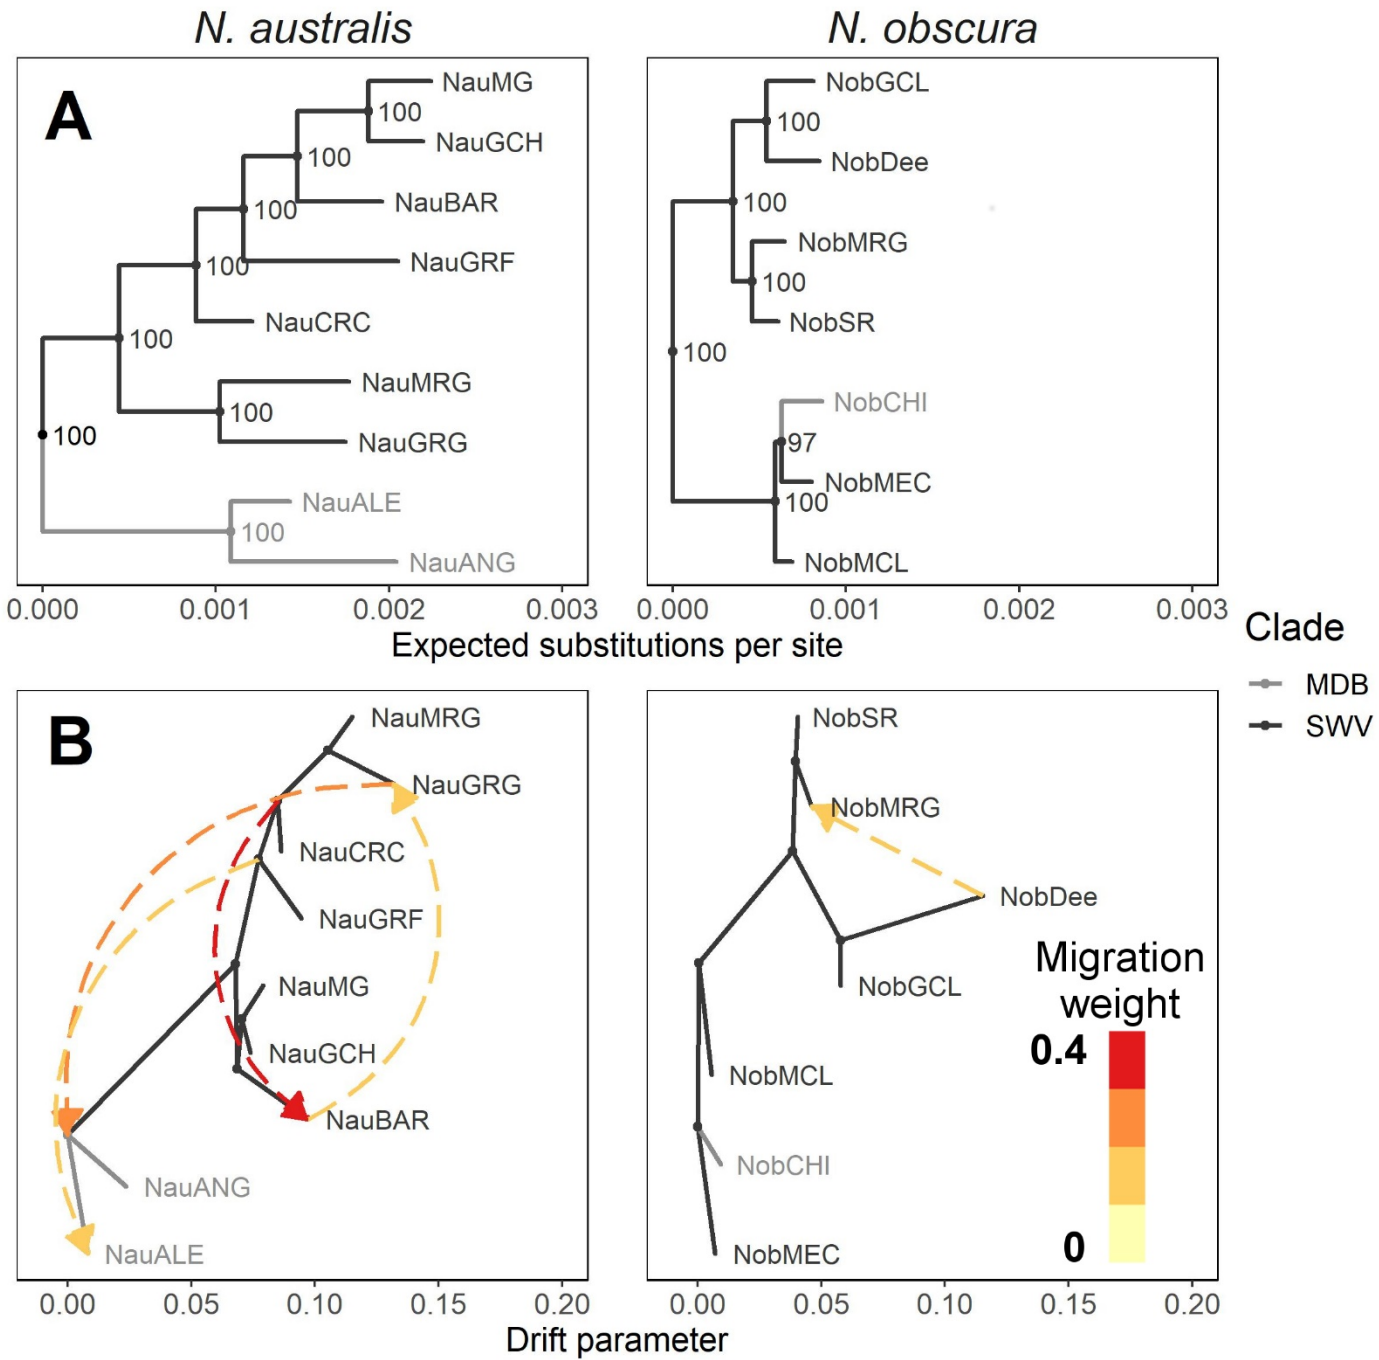

825

826



827 **Figure 3**

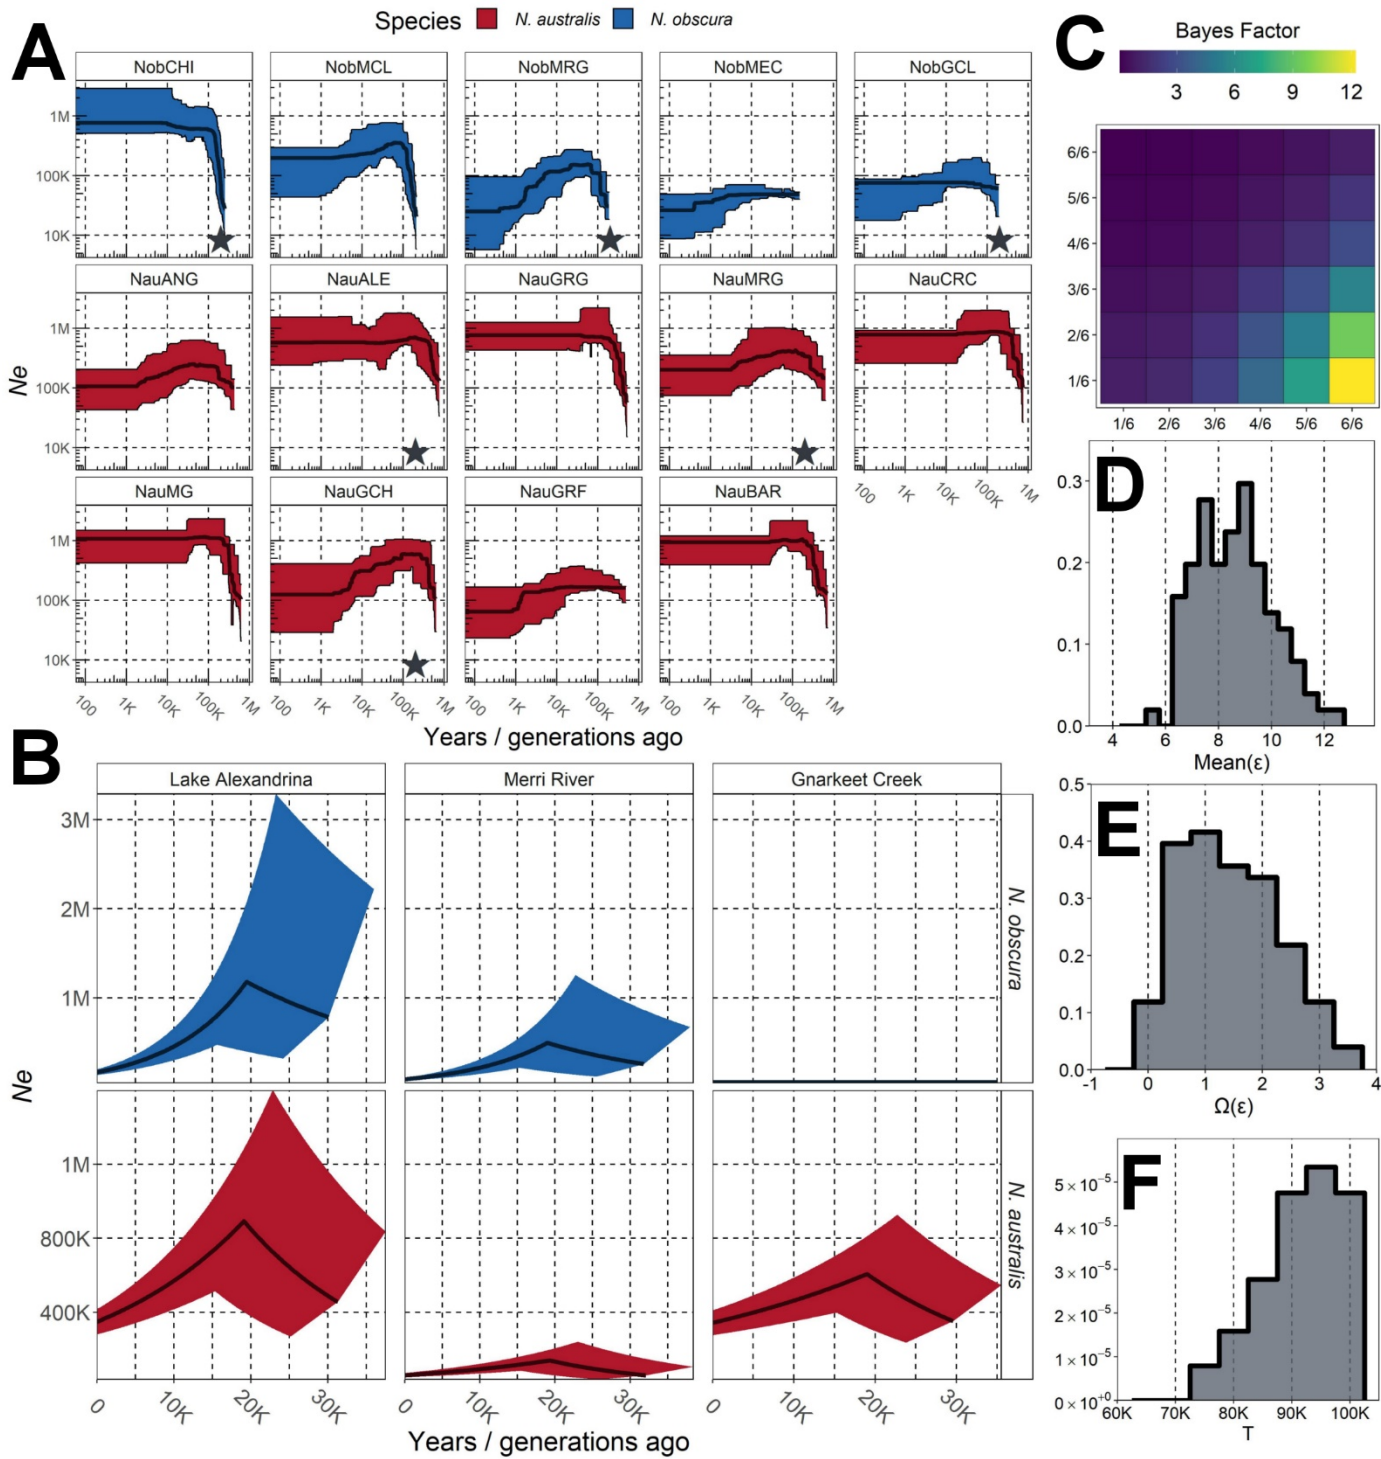

828

829

830 **Figure 4**

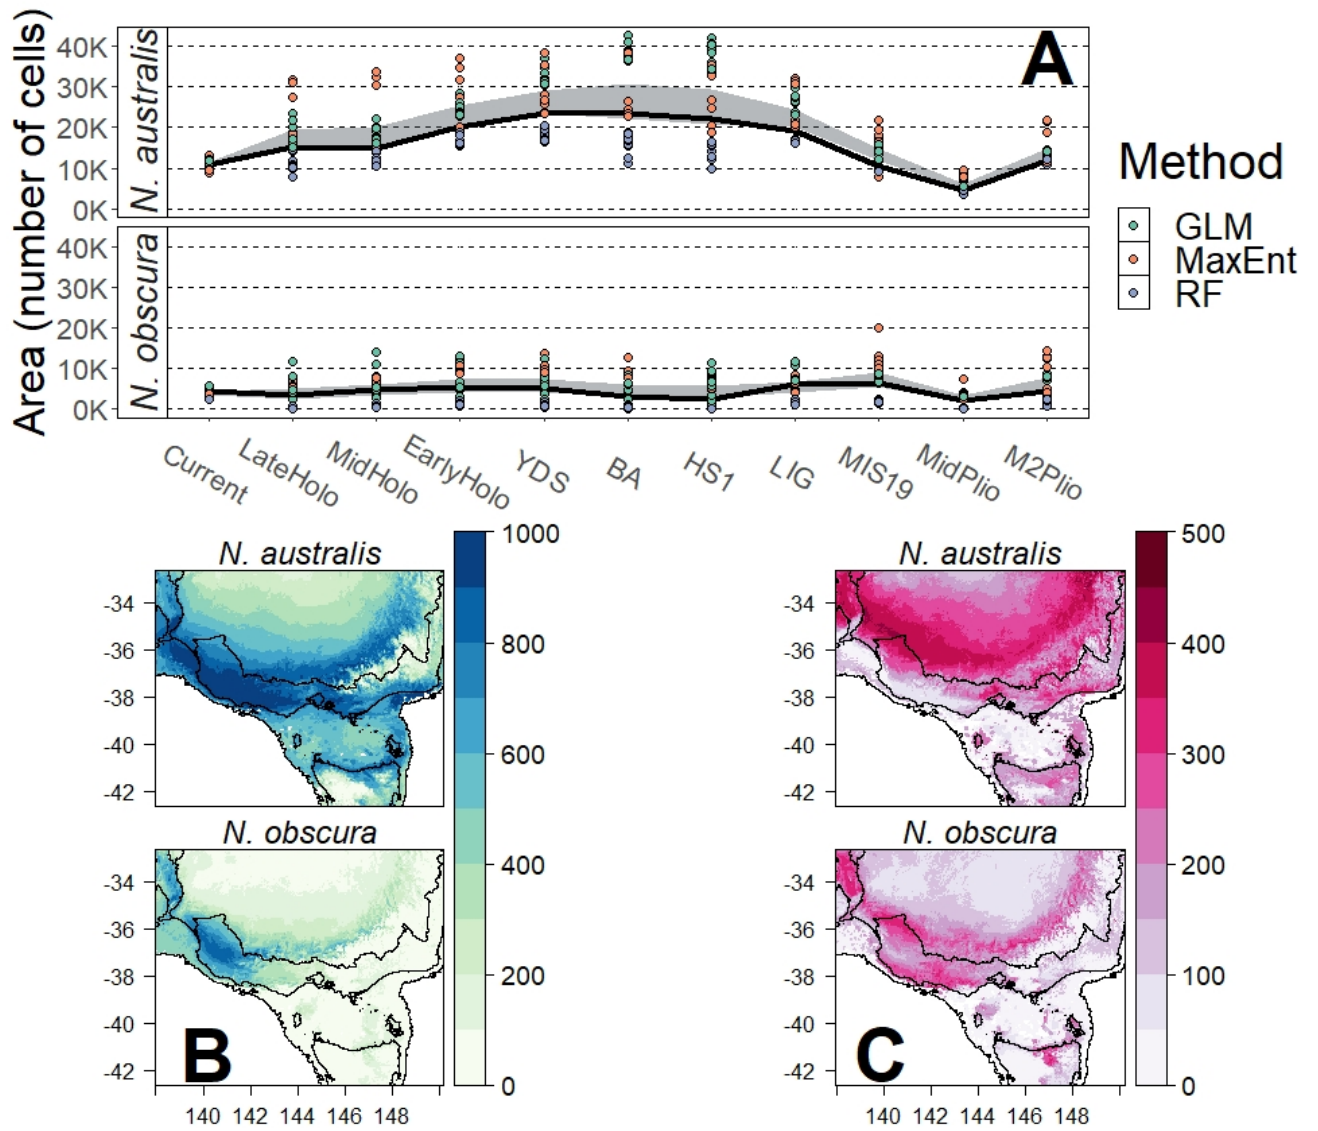

831

832
